# Supplementary material for: The influence of π–π-stacking on the light-harvesting properties of perylene bisimide antennas that are covalently linked to a [60]fullerene
Source: Royal Society of Chemistry journal article supplement (doi:10.1039/c0cp01200a), 2010-01-01
Supplement: c0cp01200a.pdf [file c0cp01200a.pdf]

## Supporting Information

### **The influence of $\pi$ - $\pi$ -stacking on the light-harvesting properties of perylene bisimide antennas that are covalently linked to a [60]fullerene**

Christiane C. Hofmann<sup>1</sup>, Stefan M. Lindner<sup>2</sup>, Michaela Ruppert<sup>3</sup>, Andreas Hirsch<sup>3</sup>, Saif A. Haque<sup>4</sup>, Mukundan Thelakkat<sup>2</sup> and Jürgen Köhler<sup>1\*</sup>

<sup>1</sup> Department of Experimental Physics IV and BIMF, University of Bayreuth, D-95440 Bayreuth, Germany

<sup>2</sup> Applied Functional Polymers, University of Bayreuth, D-95440 Bayreuth, Germany

<sup>3</sup> Organische Chemie II, Friedrich-Alexander-Universität Erlangen-Nürnberg, 91054 Erlangen, Germany

<sup>4</sup> Department of Chemistry, Imperial College of Science, Technology and Medicine, London SW72AZ, UK

\* Corresponding author. E-mail: [juergen.koehler@uni-bayreuth.de](mailto:juergen.koehler@uni-bayreuth.de)

## Synthesis

The synthetic route for the preparation of fullerene with two covalently linked perylene bisimides, **A<sub>2</sub>-F (3)** is shown in scheme 1. The hydroxyl functionalized perylene bisimide (**1**) reported elsewhere<sup>1,2</sup> was coupled with malonyl dichloride to get the disubstituted malonate (**2**). The cyclopropanation of C<sub>60</sub> was carried out by a modified Bingel reaction<sup>3</sup> of the malonate **2** with iodine and 1,8-diazabicyclo[5.4.0]undec-7-ene (DBU) in toluene<sup>4</sup>. This coupling reaction was performed with good yield of 47% to obtain PBI-fullerene-PBI triad, **A<sub>2</sub>-F (3)**.

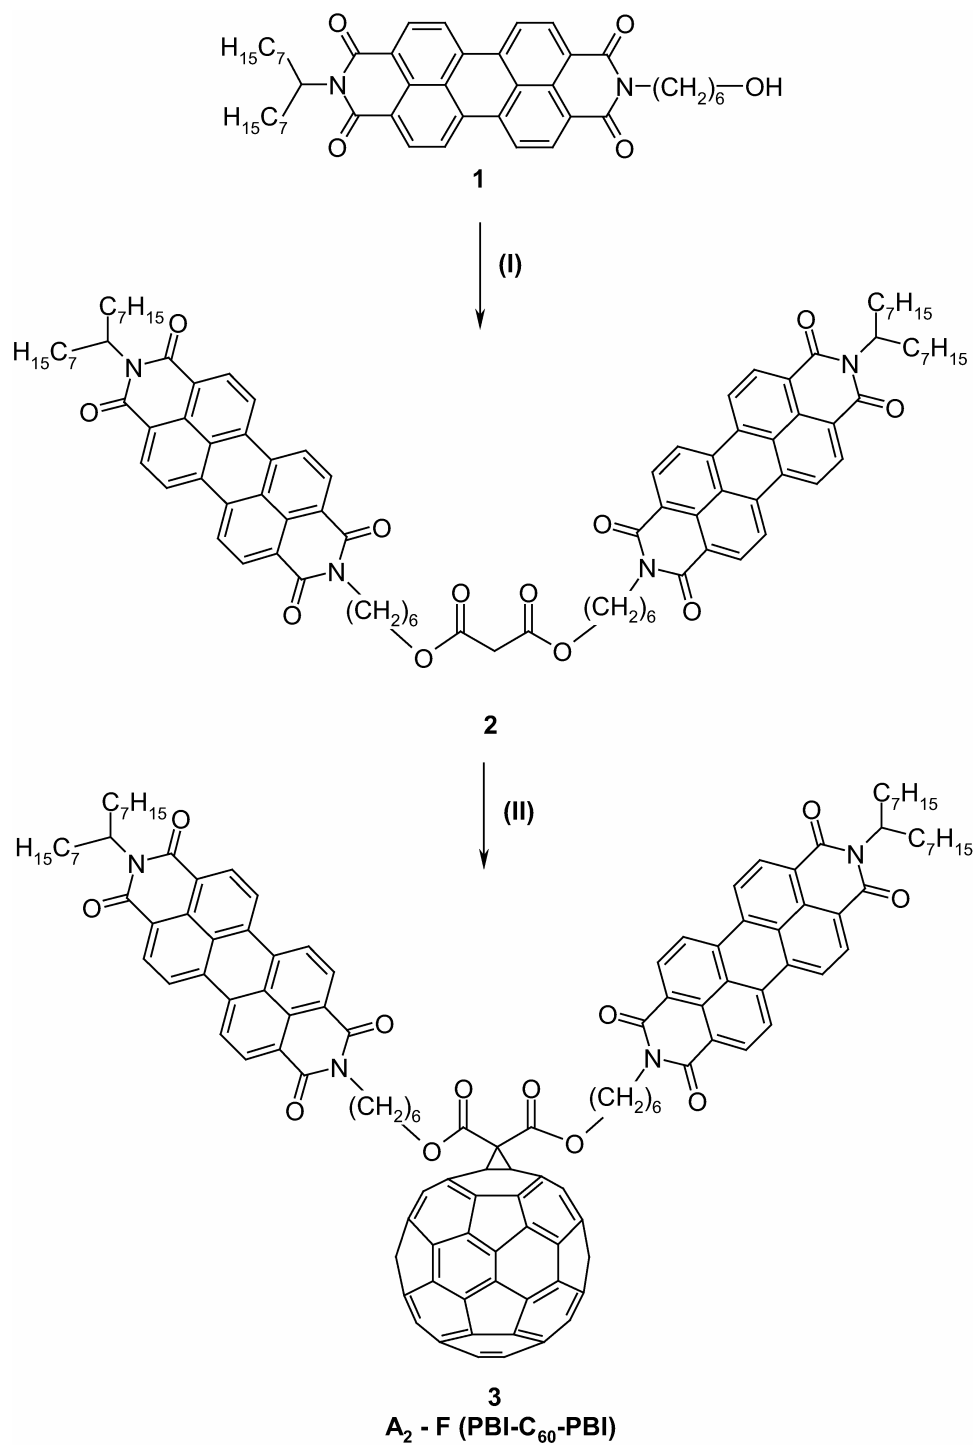

Scheme 1: Synthetic strategy of  $A_2-F$  (PBI- $C_{60}$ -PBI triad). *Reagents and conditions:*

(I) malonyl dichloride, pyridine,  $CH_2Cl_2$ ; (II)  $C_{60}$ ,  $I_2$ , 1,8-diazabicyclo[5.4.0]undec-7-ene (DBU), toluene.

## Experimental

The synthesis of compound **1** and **A-F** were reported earlier<sup>1,2</sup>. All reagents and solvents were of analytical grade or purified using standard methods.

### Synthesis of the symmetrical substituted malonate (**2**)

**1** (100 mg, 0.14 mmol) was dissolved in CH<sub>2</sub>Cl<sub>2</sub> (50 cm<sup>3</sup>) and pyridine (14 μl, 0.17 mmol) was added under protecting gas. The mixture was cooled in an ice bath and malonyl dichloride (10 μl, 0.11 mmol) in CH<sub>2</sub>Cl<sub>2</sub> (10 cm<sup>3</sup>) was added dropwise. The mixture was stirred for 12h at room temperature. The product was purified by column chromatography (silica gel, CH<sub>2</sub>Cl<sub>2</sub>/ethyl acetate 80/20) to yield **2** (104 mg, 99%) as a red solid.  $\lambda_{\max}$  (CH<sub>2</sub>Cl<sub>2</sub>)/nm 462, 491 and 526 ( $\epsilon/\text{dm}^3 \text{ mol}^{-1} \text{ cm}^{-1}$  24 000, 51 000 and 56 000);  $\nu_{\max}$ (film)/cm<sup>-1</sup> 3054, 2986, 2929, 2857, 1695, 1655, 1595, 1421, 1342, 1266, 1258 and 748;  $\delta_{\text{H}}$ (300 MHz; CDCl<sub>3</sub>) 0.83 (12H, t, *J* 6.57 Hz, CH<sub>3</sub>), 1.30 (40H, m, CH<sub>2</sub>), 1.50 (8H, m, CH<sub>2</sub>), 1.75 (8H, m, CH<sub>2</sub>), 1.90 (4H, m, CH<sub>2</sub>), 2.20 (4H, m, CH<sub>2</sub>), 3.40 (2H, s, OCCH<sub>2</sub>CO), 4.15 (8H, m, NCH<sub>2</sub>, CH<sub>2</sub>O), 5.10 (2H, m, N-CH(CH<sub>2</sub>)<sub>2</sub>), 8.10 (4H, d, *J* 8.15 Hz, Ar-H), 8.20 (4H, d, *J* 8.15 Hz, Ar-H), 8.30 (4H, d, *J* 7.98 Hz, Ar-H) and 8.40 (4H, d, *J* 7.55 Hz, Ar-H);  $\delta_{\text{C}}$ (75MHz; CDCl<sub>3</sub>) 14.10, 22.60, 25.50, 26.70, 27.00, 27.80, 28.25, 29.20, 29.60, 31.80, 32.20, 42.00, 44.00, 55.00, 65.50, 122.60, 125.80, 129.00, 131.00, 134.10, 162.80 and 166.60; *m/z* (FAB) 1469 (M<sup>+</sup>).

### Synthesis of A<sub>2</sub>-F (PBI-C<sub>60</sub>-PBI) (**3**)

To a solution of C<sub>60</sub> (74 mg, 0.10 mmol) in toluene (150 cm<sup>3</sup>), iodine (18 mg, 0.07 mmol) and **2** (100 mg, 0.07 mmol) were added and the mixture was degassed with argon for 30 minutes. 1,8-diazabicyclo[5.4.0]undec-7-ene (DBU) (20 μl, 0.14 mmol) in toluene (15 cm<sup>3</sup>) was added dropwise within one hour and the reaction was stirred over night. The product was purified with column chromatography (silica gel, toluene/ethyl acetate 90/10) to yield **3** (70 mg, 47 %) as a dark-red solid.  $\lambda_{\max}$  (CH<sub>2</sub>Cl<sub>2</sub>)/nm 260, 325, 461, 492 and 528;  $\nu_{\max}$ (film)/cm<sup>-1</sup> 3054, 2928, 2304, 1695, 1655, 1595, 1421, 1342, 1257 and 757;  $\delta_{\text{H}}$ (400 MHz; CDCl<sub>3</sub>) 0.83 (12H, t, *J* 6.53 Hz, CH<sub>3</sub>), 1.30 (40H, m, CH<sub>2</sub>), 1.60 (8H, m, CH<sub>2</sub>), 1.90 (8H, m, CH<sub>2</sub>), 2.20 (4H, m, CH<sub>2</sub>), 4.30 (4H, m, NCH<sub>2</sub>), 4.53 (2H, t, *J* 6.22 Hz, CH<sub>2</sub>O), 5.10 (2H, m, N-CH(CH<sub>2</sub>)<sub>2</sub>), 8.20 (8H, m, Ar-H), 8.40 (8H, m, Ar-H);  $\delta_{\text{C}}$ (75MHz; CDCl<sub>3</sub>) 14.10, 22.60, 25.50, 26.70, 27.00, 27.80, 28.25, 29.20, 29.60, 31.80, 32.20, 42.00, 52.00, 55.00, 65.50, 71.60,

122.60, 122.80, 123.00, 125.80, 129.30, 131.00, 134.10, 140.85, 141.90, 142.10, 142.90, 142.95, 143.00, 143.20, 143.80, 144.50, 144.60, 144.80, 145.10, 145.20, 145.40, 163.10, 163.90;  $m/z$  (FAB) 720 ( $C_{60}^+$ ), 2188 ( $M^+$ ).

- 
- <sup>1</sup> Ch. C. Hofmann, S. M. Lindner, M. Ruppert, A. Hirsch, S. A. Haque, M. Thelakkat, and J. Köhler *J. Phys. Chem. B*, 2010, DOI: 10.1021/jp1035585.
  - <sup>2</sup> A. Wicklein, A. Lang, M. Muth, and M. Thelakkat, *J. Am. Chem. Soc.* 2009, **131**, 14442-14453.
  - <sup>3</sup> C. Bingel, *Chem. Ber.*, 1993, **126**, 1957-1959.
  - <sup>4</sup> J.-F. Nierengarten, V. Gramlich, F. Cardullo, and F. Diederich, *Angew. Chem. Int. Ed.*, 1996, **35**, 2101-2103.
